# Supplementary material for: A Potato Virus Y Infection under Ambient Conditions That Turn It Asymptomatic Affects the Physiology of the Host, and Its Interplay with Drought
Source: Preprints.org preprint supplement (doi:10.20944/preprints202407.1421.v1), 2024-07-17
Supplement: Supplementary file 1 [file supplementary]

**SUPPLEMENTAL MATERIAL**

**Figure S1**


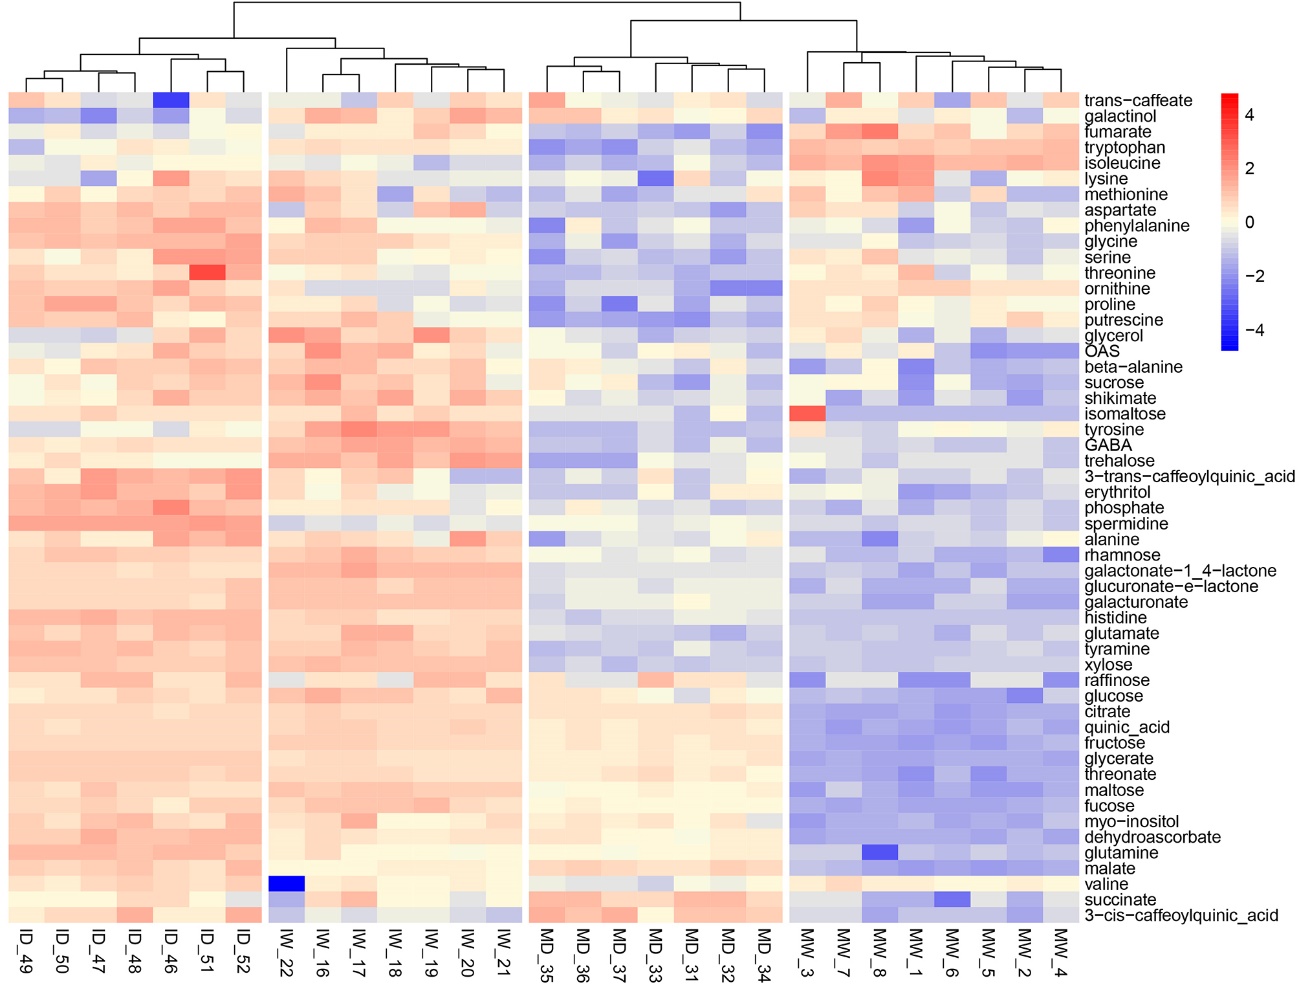


**Figure S1.** **The effects of PVY infection, of drought, or of both combined, on the metabolome of *Nicotiana benthamiana* plants grown at 30 °C and 790 ppm ambient CO2**. Hierarchical heat map on the metabolomic analysis of 53 compounds present in fresh leaf tissuesobtainedfrom plants kept under the four separate treatments (mock/watered, MW; infected/watered, IW; mock/drought, MD; infected/drought, ID).
